# Supplementary material for: Eco-friendly synthesis of N,S co-doped hierarchical nanocarbon as a highly efficient metal-free catalyst for the reduction of nitroarenes
Source: Royal Society of Chemistry journal article supplement (doi:10.1039/c8nr07083k), 2018-01-01
Supplement: c8nr07083k1.pdf [file c8nr07083k1.pdf]

## Electronic Supplementary Information (ESI)

### Eco-friendly synthesis of N,S co-doped hierarchical nanocarbon as highly efficient metal-free catalyst for reduction of nitroarenes

Sijie Liu,<sup>a</sup> Liting Cui,<sup>b</sup> Zhiyao Peng,<sup>a</sup> Jingjing Wang,<sup>a</sup> Yajing Hu,<sup>a</sup> Ao Yu,<sup>a</sup> Haining Wang,<sup>\*b</sup> Ping Peng,<sup>\*a</sup> Fang-Fang Li<sup>\*a</sup>

<sup>a</sup> State Key Laboratory of Materials Processing and Die & Mould Technology, School of Materials Science and Engineering, Huazhong University of Science and Technology, Wuhan 430074

<sup>b</sup> Beijing Key Laboratory of Bio-inspired Energy Materials and Devices, School of Space and Environment, Beihang University, Beijing, 100191, China.

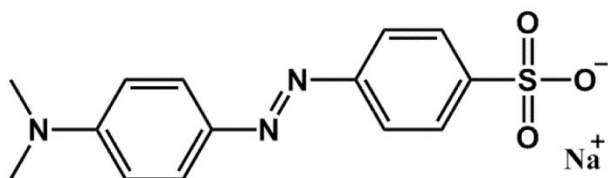

**Figure S1.** Chemical structure of the sulphonate-based anionic dye-methyl orange (MO). The chemical formula of MO is  $C_{14}H_{14}N_3O_3SNa$ . The negatively charged  $(C_{14}H_{14}N_3O_3S)^{-1}$  can be intercalated into the interlayers of LDH as counter ions.

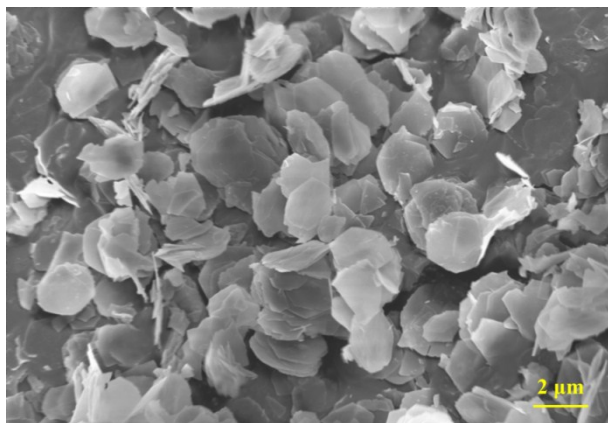

**Figure S2.** Low magnification SEM image of Mg-Al LDH.

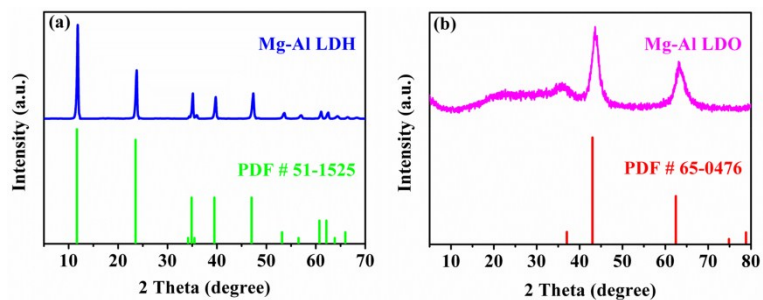

**Figure S3.** PXR patterns of Mg-Al LDH (a) and Mg-Al LDO (b).

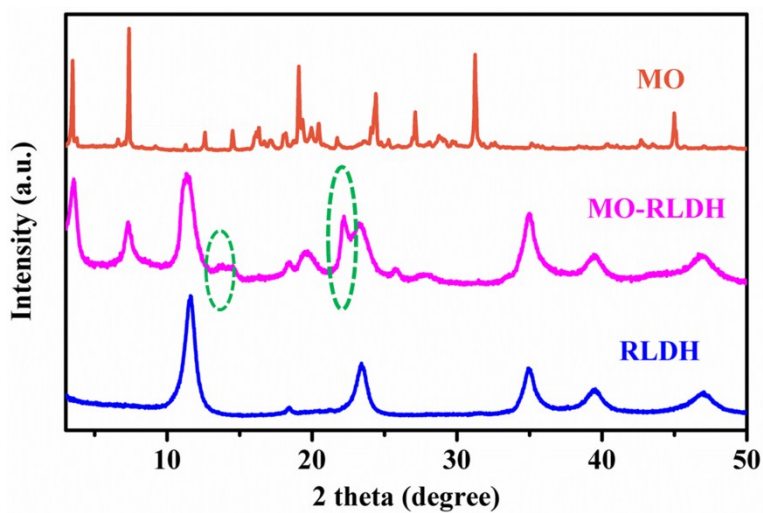

**Figure S4.** PXR patterns of MO, RLDH and MO-RLDH.

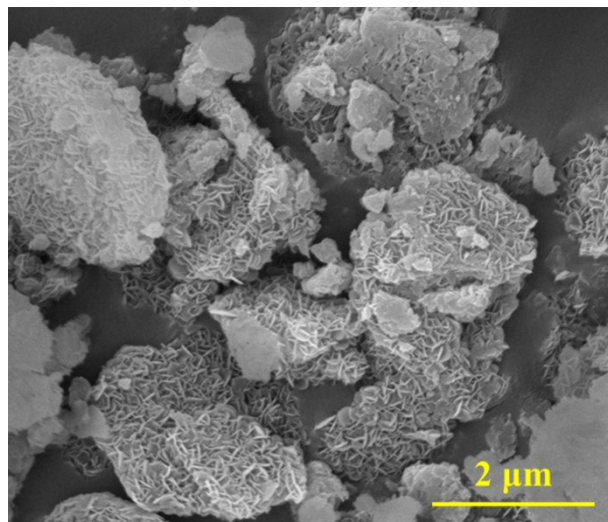

**Figure S5.** Low magnification SEM image of NSHC.

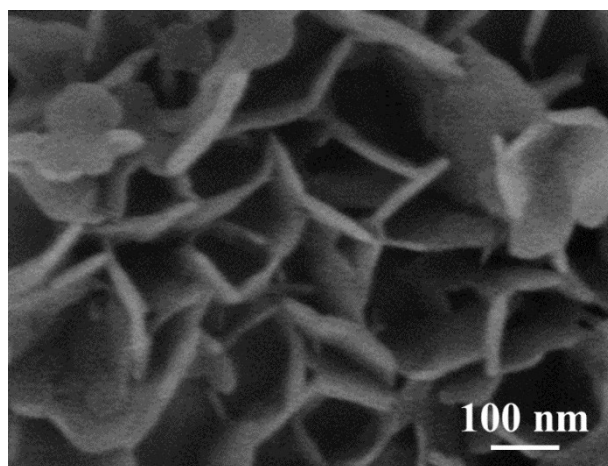

**Figure S6.** High magnification SEM image of NSHC.

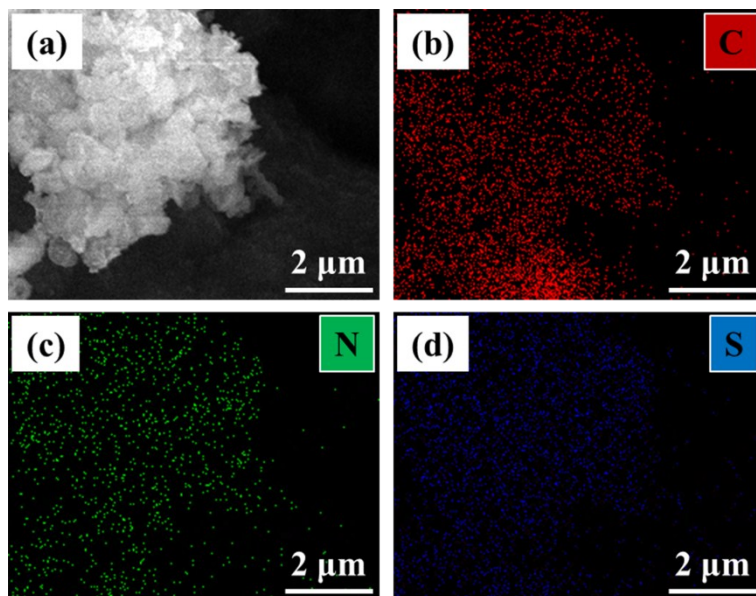

**Figure S7.** The energy dispersive X-ray spectroscopy (EDS) elemental mapping of NSHC.

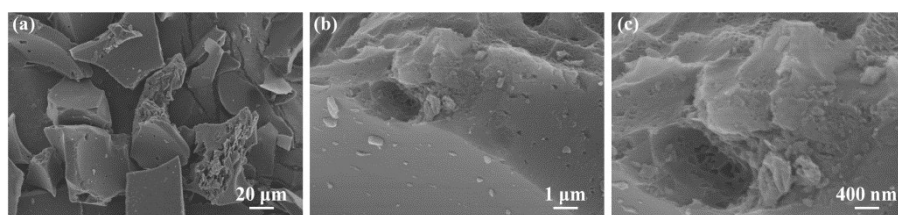

**Figure S8.** SEM images of NSC.

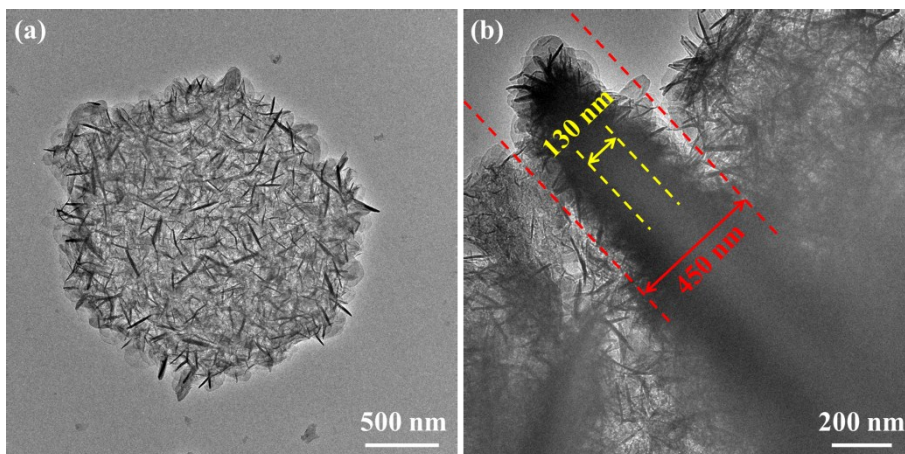

**Figure S9.** TEM images of NSHC. (a) TEM image observed from top view; (b) TEM image observed from side view.

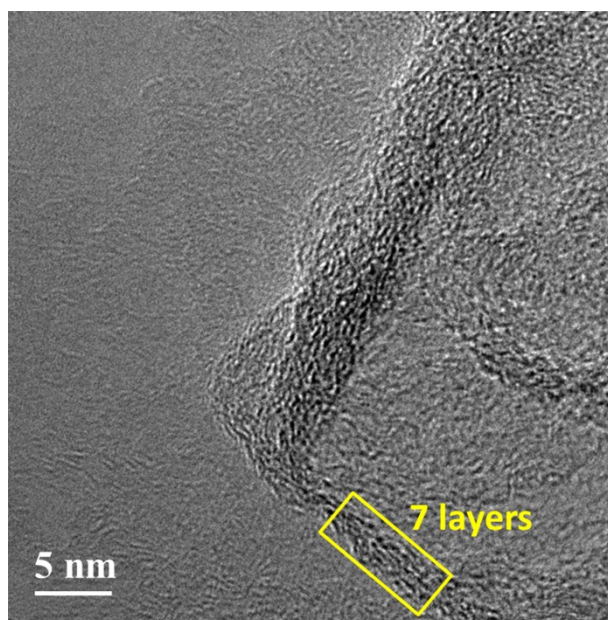

**Figure S10.** HRTEM image of the ultrathin subunit carbon nanosheets.



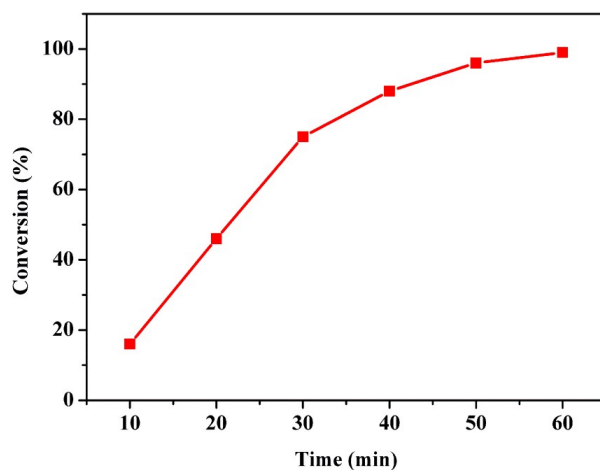

**Figure S11.** Time dependent conversion over NSHC for nitrobenzene reduction. Reaction conditions: 0.5 g nitrobenzene, 2 mL hydrazine hydrate (85 wt%), 1 mL 1-propanol, 10 mg NSHC, 100 °C.

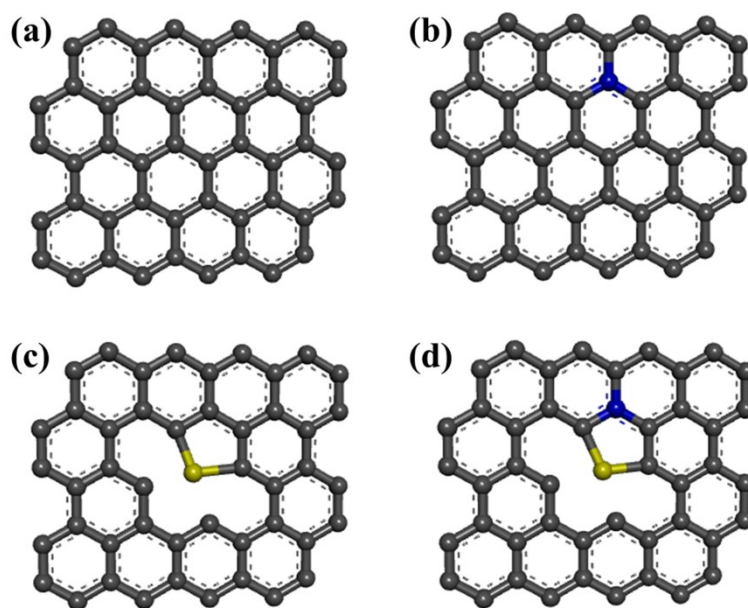

**Figure S12.** Various graphene models for DFT calculation. (a) Pure graphene; (b) N-doped graphene; (c) S-doped graphene and (d) N,S co-doped graphene.

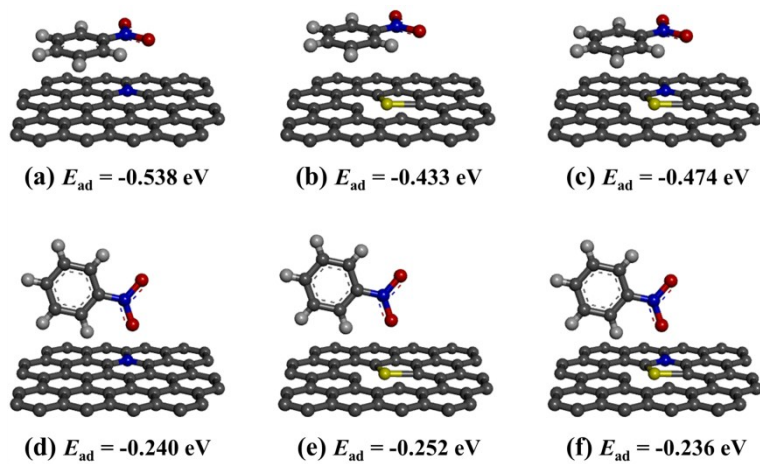

**Figure S13.** The adsorption energy ( $E_{ad}$ ) of nitrobenzene on N-doped, S-doped and N,S-codoped graphene models. Both parallel adsorption and vertical adsorption were calculated.

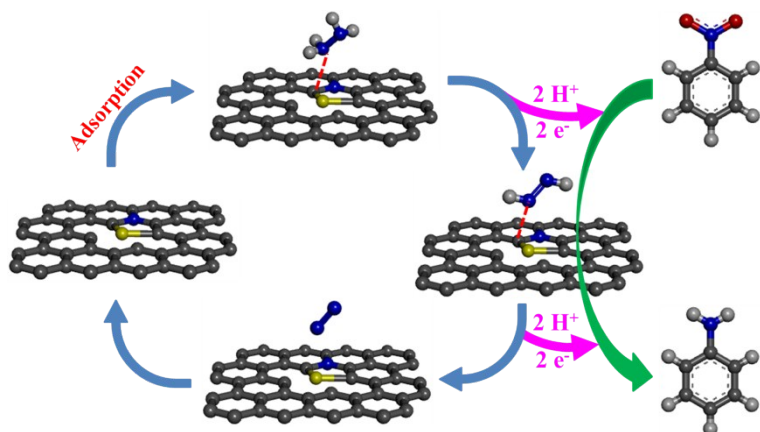

**Figure S14.** Proposed mechanism for the reduction of nitrobenzene by hydrazine over NSHC catalyst.

**Table S1.** XPS analytic data of NSHC, NSC, NHC and SHC

| sample | C (at%) | O (at%) | N (at%) | S (at%) |
|--------|---------|---------|---------|---------|
| NSHC   | 90.37   | 5.31    | 1.93    | 2.39    |
| NSC    | 79.24   | 10.22   | 8.79    | 1.75    |
| NHC    | 89.95   | 5.44    | 4.61    | --      |
| SHC    | 87.95   | 8.76    | --      | 3.29    |
